# Supplementary material for: Lipopolysaccharide Specific Immunochromatography Based Lateral Flow Assay for Serogroup Specific Diagnosis of Leptospirosis in India
Source: PubMed Central journal article supplement (PMC4560487; doi:10.1371/journal.pone.0137130), 2015-09-04
Supplement: pone.0137130.s001.pdf [file pone.0137130.s001.pdf]

**S1 Fig: Determination of optimal antigen (LPS) concentration for IgM Dot blot assay**

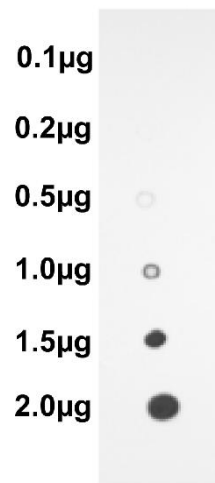

Various concentrations of LPS from *L. interrogans* serovar Autumnalis was probed with MAT positive sera for serovar Autumnalis
