# Supplementary material for: Lipopolysaccharide Specific Immunochromatography Based Lateral Flow Assay for Serogroup Specific Diagnosis of Leptospirosis in India
Source: PubMed Central journal article supplement (PMC4560487; doi:10.1371/journal.pone.0137130), 2015-09-04
Supplement: pone.0137130.s003.pdf [file pone.0137130.s003.pdf]

**S3 Fig: Evaluation of LPS based ICG-LFA**

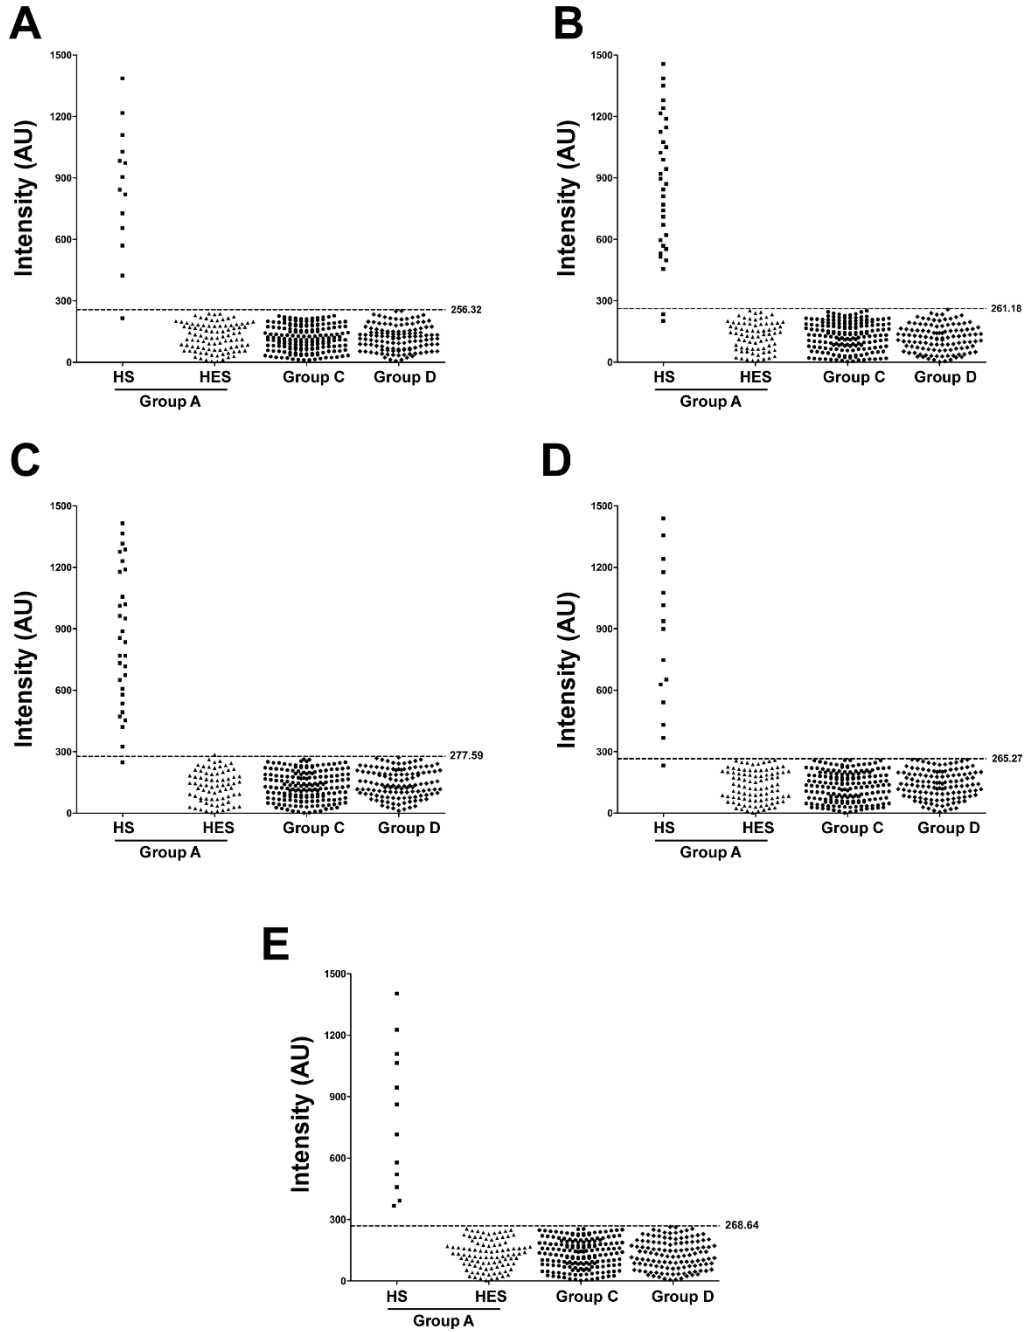

Study groups are indicated on the  $x$  axis and the optical density (OD) at 490 nm on the  $y$  axis. IgM responses to various leptospiral LPS: Autumnalis (A), Australis (B), Ballum (C), Grippotyphosa (D), Pomona (E) are shown. The dashed line represents the cut-off values for each antigens with the absolute cut-off values on the right. Study groups were as described in Table 1.
