# Supplementary material for: Lipopolysaccharide Specific Immunochromatography Based Lateral Flow Assay for Serogroup Specific Diagnosis of Leptospirosis in India
Source: PubMed Central journal article supplement (PMC4560487; doi:10.1371/journal.pone.0137130), 2015-09-04
Supplement: pone.0137130.s004.pdf [file pone.0137130.s004.pdf]

**S1 Table: Comparison of MAT with IgM ELISA/culture positivity**

| MAT               | IgM ELISA |          | Total | MAT                 | Culture positivity |          | Total |
|-------------------|-----------|----------|-------|---------------------|--------------------|----------|-------|
|                   | Positive  | Negative |       |                     | Positive           | Negative |       |
| Positive          | 90        | 30       | 120   | Positive            | 7                  | 113      | 120   |
| Negative          | 40        | 40       | 80    | Negative            | 2                  | 78       | 80    |
| Total             | 130       | 70       | 200   | Total               | 9                  | 191      | 200   |
| Sensitivity: 75%  |           |          |       | Sensitivity: 5.8%   |                    |          |       |
| Specificity : 50% |           |          |       | Specificity : 97.5% |                    |          |       |
