# Supplementary material for: Lipopolysaccharide Specific Immunochromatography Based Lateral Flow Assay for Serogroup Specific Diagnosis of Leptospirosis in India
Source: PubMed Central journal article supplement (PMC4560487; doi:10.1371/journal.pone.0137130), 2015-09-04
Supplement: pone.0137130.s005.pdf [file pone.0137130.s005.pdf]

**S2 Table: Median MAT titers of the 120 MAT positive sera samples**

| <b>Serogroup</b>    | <b>Number positive n (%)</b> | <b>MAT titer</b> | <b>Number of isolates obtained (n = 9)*</b> |
|---------------------|------------------------------|------------------|---------------------------------------------|
| Autumnalis          | 14 (11.7)                    | 1:2560           | 2                                           |
| Australis           | 33 (27.5)                    | 1:2560           | 1                                           |
| Ballum              | 31 (25.8)                    | 1:640            | -                                           |
| Grippotyphosa       | 15 (12.5)                    | 1:640            | -                                           |
| Pomona              | 12 (10)                      | 1:640            | 1                                           |
| Canicola            | 8 (6.7)                      | 1:160            | 4                                           |
| Icterohaemorrhagiae | 4 (3.3)                      | 1:160            | -                                           |
| Javanica            | 3 (2.5)                      | 1:160            | 1                                           |

\* Indicate serogroup obtained by isolation was identical to the serogroup identified by MAT. Number of isolates obtained in the corresponding serogroups are given.
