# Supplementary material for: Lipopolysaccharide Specific Immunochromatography Based Lateral Flow Assay for Serogroup Specific Diagnosis of Leptospirosis in India
Source: PubMed Central journal article supplement (PMC4560487; doi:10.1371/journal.pone.0137130), 2015-09-04
Supplement: pone.0137130.s007.pdf [file pone.0137130.s007.pdf]

**S4 Table: Sensitivity, Specificity, PPV, NPV and kappa value of various leptospiral LPS based IgM dot blot against homologous sera**

| <b>Antigen (LPS)</b> | <b>Sensitivity %</b> | <b>Specificity %</b> | <b>PPV %</b> | <b>NPV %</b> | <b>kappa value</b> |
|----------------------|----------------------|----------------------|--------------|--------------|--------------------|
| Autumnalis           | 92.86                | 99.74                | 92.86        | 99.74        | 0.926              |
| Australis            | 93.93                | 99.73                | 96.88        | 99.46        | 0.950              |
| Ballum               | 96.77                | 99.19                | 90.91        | 99.73        | 0.932              |
| Grippotyphosa        | 100                  | 99.48                | 87.5         | 100          | 0.931              |
| Pomona               | 91.67                | 99.74                | 91.67        | 99.74        | 0.914              |
